# Supplementary material for: Opioid Prescription Following Wrist and Ankle Fracture Fixation in Scotland—Tradition Prevails
Source: MDPI journal article supplement (doi:10.3390/jcm11020468), 2022-01-17
Supplement: s1 [file s1]

## **Supplementary Material**

### **Score collaborators:**

James Beastall <sup>2</sup>, David Munn <sup>3</sup>, Bilal Jamal <sup>3</sup>, Luke Murphy <sup>4</sup>, Jibu Joseph <sup>4</sup>, Rehan Mackenzie <sup>5</sup>,  
Clarissa Hocking <sup>5</sup>, Ramaa Parulekar <sup>5</sup>, Sheng Wei Chiam <sup>5</sup>, Arpit Jariwala <sup>5</sup>, Nicholas Clement <sup>6</sup>
